# Supplementary material for: Association between antiplatelet medication and cerebral microbleeds in stroke-free population
Source: PubMed Central journal article supplement — J Geriatr Cardiol. 2022 Jun 28;19(6):409–17. doi: 10.11909/j.issn.1671-5411.2022.06.002 (PMC9248274; doi:10.11909/j.issn.1671-5411.2022.06.002), 2022-06-28
Supplement: jgc-19-6-409-S1.pdf [file jgc-19-6-409-S1.pdf]

## Supplementary Table

**Table 1S Characteristics of antiplatelet medication users stratified by CMB presence.**

| Variables                                    | Total (n = 64)                | CMB present (n = 32)          | CMB absent (n = 32)           | P-value |
|----------------------------------------------|-------------------------------|-------------------------------|-------------------------------|---------|
| Age, yrs                                     | 69.63 ± 8.56                  | 70.88 ± 8.04                  | 68.38 ± 9.00                  | 0.246   |
| Men                                          | 35 (54.69%)                   | 23 (71.88%)                   | 12 (37.50%)                   | 0.006   |
| History of smoke                             | 15 (23.44%)                   | 9 (28.13%)                    | 6 (18.75%)                    | 0.376   |
| Alcohol consumption                          | 29 (45.31%)                   | 15 (46.88%)                   | 14 (43.75%)                   | 0.802   |
| Medical history                              |                               |                               |                               |         |
| Hypertension                                 | 46 (71.88%)                   | 23 (71.88%)                   | 23 (71.88%)                   | 0.999   |
| Dyslipidemia                                 | 49 (76.56%)                   | 22 (68.75%)                   | 27 (84.38%)                   | 0.140   |
| Diabetes mellitus                            | 16 (25.00%)                   | 7 (21.88%)                    | 9 (28.13%)                    | 0.564   |
| Atrial fibrillation                          | 6 (9.38%)                     | 4 (12.50%)                    | 2 (6.25%)                     | 0.672   |
| History of medication                        |                               |                               |                               |         |
| Antihypertensive medication                  | 44 (68.75%)                   | 22 (68.75%)                   | 22 (68.75%)                   | 0.999   |
| Lipid-lowering medication                    | 46 (71.88%)                   | 21 (65.63%)                   | 25 (78.13%)                   | 0.266   |
| Oral hypoglycemic agents or insulin          | 12 (18.75%)                   | 5 (15.63%)                    | 7 (21.88%)                    | 0.522   |
| Physical examination                         |                               |                               |                               |         |
| Body mass index, kg/m <sup>2</sup>           | 24.67 ± 3.71                  | 24.56 ± 3.56                  | 24.77 ± 3.92                  | 0.821   |
| Systolic blood pressure, mmHg                | 131.18 ± 15.19                | 128.80 ± 14.68                | 133.56 ± 15.54                | 0.213   |
| Diastolic blood pressure, mmHg               | 73.77 ± 8.81                  | 73.30 ± 9.02                  | 74.25 ± 8.72                  | 0.669   |
| Laboratory examination                       |                               |                               |                               |         |
| Fasting blood glucose, mmol/L                | 5.24 ± 1.09                   | 5.17 ± 1.29                   | 5.31 ± 0.85                   | 0.619   |
| Hemoglobin A1c, %                            | 6.08 ± 0.79                   | 6.17 ± 0.92                   | 6.00 ± 0.64                   | 0.409   |
| Low-density lipoprotein cholesterol, mmol/L  | 2.49 ± 0.77                   | 2.53 ± 0.63                   | 2.45 ± 0.89                   | 0.680   |
| High-density lipoprotein cholesterol, mmol/L | 1.46 ± 0.36                   | 1.37 ± 0.35                   | 1.56 ± 0.35                   | 0.035   |
| High-sensitivity C-reactive protein, mg/L    | 0.80 (0.60–2.25) <sup>*</sup> | 0.80 (0.60–2.00) <sup>*</sup> | 0.95 (0.50–2.65) <sup>*</sup> | 0.989   |

Data are presented as means ± SD or n (%). <sup>\*</sup>Presented as median (interquartile range). CMB: cerebral microbleed.
